# Supplementary material for: Punicalagin improves hepatic lipid metabolismviamodulation of oxidative stress and mitochondrial biogenesis in hyperlipidemic mice
Source: Royal Society of Chemistry journal article supplement (doi:10.1039/d0fo01545h), 2020-01-01
Supplement: d0fo01545h1.pdf [file d0fo01545h1.pdf]

### Supporting information

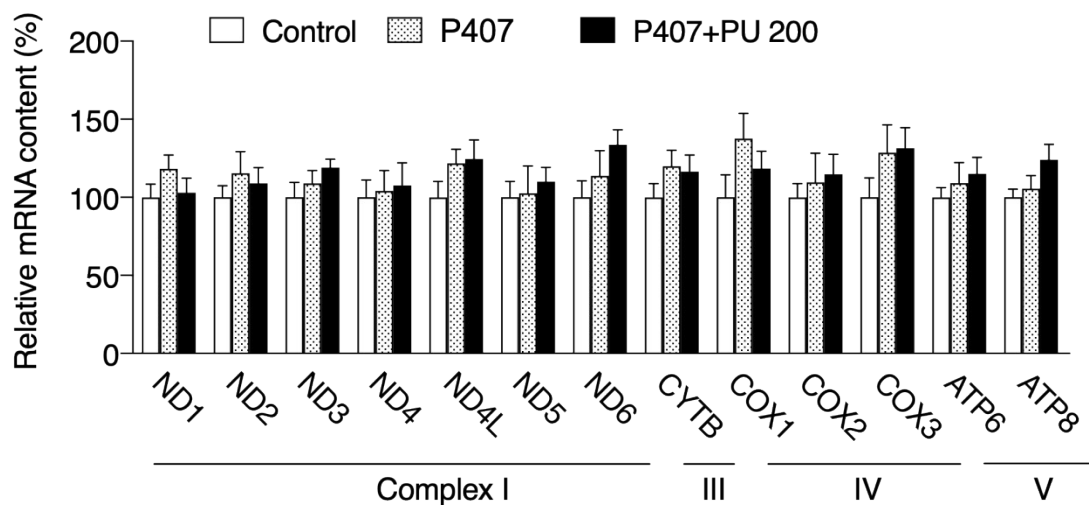

Figure S1 Effects of PU on mRNA levels of mitochondrial DNA-encoded mitochondrial complex subunits. Con, control; P407, poloxamer 407; P407 + PU 200, poloxamer 407 plus PU at 200 mg/kg/day. (A) Liver relative mRNA levels of mtDNA-encoded mitochondrial complex subunits. The values are the means  $\pm$  S.E.M. (n =6).

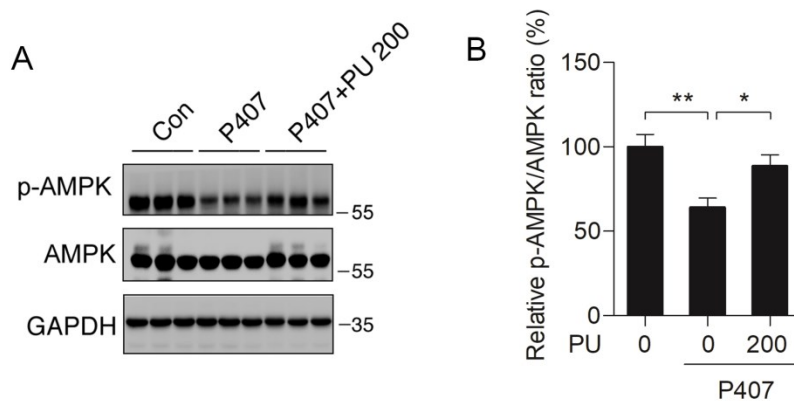

Figure S2 p-AMPK and AMPK protein levels in hyperlipidemic mouse liver. Con, control; P407, poloxamer 407; P407 + PU 200, poloxamer 407 plus PU at 200 mg/kg/day. (A) Liver relative mRNA levels of mtDNA-encoded mitochondrial complex subunits. The values are the means  $\pm$  S.E.M. (n =6).

**Table S1** Primers

| Species | Gene            | Primer (5'-3')                   |
|---------|-----------------|----------------------------------|
| Mouse   | <i>18S rRNA</i> | Forward: GTAACCCGTTGAACCCCAT     |
|         |                 | Reverse: CCATCCAATCGGTAGTAGCG    |
| Mouse   | <i>Nrf2</i>     | Forward: GCAGGCTATCTCCTAGTTCT    |
|         |                 | Reverse: CAATCAAATCCATGTCCTGC    |
| Mouse   | <i>NQO1</i>     | Forward: AGGATGGGAGGTAAGTCAATC   |
|         |                 | Reverse: AGGCGTCCTCCTTATATGCTA   |
| Mouse   | <i>HO1</i>      | Forward: AAGCCGAGAATGCTGAGTTCA   |
|         |                 | Reverse: GCCGTGTAGATATGGTACAAGGA |
| Mouse   | <i>Catalase</i> | Forward: AGCGACCAGATGAAGCAGTG    |
|         |                 | Reverse: TCCGCTCTCTGTCAAAGTGTG   |
| Mouse   | <i>SOD1</i>     | Forward: AACCAGTTGTGTTGTCAGGAC   |
|         |                 | Reverse: CCACCATGTTTCTTAGAGTGAGG |
| Mouse   | <i>SOD2</i>     | Forward: CAGACCTGCCTTACGACTATGG  |
|         |                 | Reverse: CTCGGTGGCGTTGAGATTGTT   |
| Mouse   | <i>GCLM</i>     | Forward: AGGAGCTTCGGGACTGTATCC   |
|         |                 | Reverse: GGGACATGGTGCATTCCAAAA   |
| Mouse   | <i>NDUFA1</i>   | Forward: ATGTGGTTCGAGATTCTCCC    |
|         |                 | Reverse: GCAACTCGTTTTTCCTTGC     |
| Mouse   | <i>NDUFS1</i>   | Forward: ATCCCATAGGTCAGACAAGC    |
|         |                 | Reverse: CAGTTGTGCGAACATATCCT    |
| Mouse   | <i>SDHA</i>     | Forward: AAGATTACAAAGTGCGGGTC    |
|         |                 | Reverse: TTTCATCAGTAGGAGCGGAT    |
| Mouse   | <i>SDHB</i>     | Forward: GTTCTCGGCAGAGTCGG       |
|         |                 | Reverse: TCCGCACTTATTCAGATCCA    |
| Mouse   | <i>UQCRB</i>    | Forward: CACTCTCAGGTCAAATGGC     |
|         |                 | Reverse: ATCTCGCATTAAACCCAGT     |
| Mouse   | <i>UQCRQ</i>    | Forward: GCGTCTATCTTCTGTCCCA     |

---

|       |                 |                                                                   |
|-------|-----------------|-------------------------------------------------------------------|
|       |                 | Reverse: ACCACTACAAACGGCGG                                        |
| Mouse | <i>COX6C</i>    | Forward: CATTGGCTACCATGAGTTCC<br>Reverse: CAGCCACGCCAAACTTATAG    |
| Mouse | <i>COX7C</i>    | Forward: GAGCAAGGTCGTGTAGAAAG<br>Reverse: GAAAATGGCAAATTCTTCCCC   |
| Mouse | <i>ATP5A1</i>   | Forward: CATTTTGTGCCAGTCGTCC<br>Reverse: ATTTTGGAGACCAGTCCCG      |
| Mouse | <i>ATP5B1</i>   | Forward: AATTCCTGTTGGTCCTGAGA<br>Reverse: CCAAAGAGTCCGATTTTCCC    |
| Mouse | <i>TFAM</i>     | Forward: AGACTACACTGGGAAACCAC<br>Reverse: GTTAGGCTTATAGGGACCCA    |
| Mouse | <i>TFB1M</i>    | Forward: CCCAAACCAAAGTTGATGT<br>Reverse: TTCCTTCGAAACTGAAACG      |
| Mouse | <i>TFB2M</i>    | Forward: GGCATTACTIONAAAGCTGGTG<br>Reverse: TTTATAGGAACACCTGCTGAC |
| Mouse | <i>POLRMT</i>   | Forward: TTCCCTCAGGAGTTTGTCTG<br>Reverse: TGATAGGGCTGTATGATGGG    |
| Human | <i>18S rRNA</i> | Forward: GTAACCCGTTGAACCCATT<br>Reverse: CCATCCAATCGGTAGTAGCG     |
| Human | <i>Nrf2</i>     | Forward: AGACAGGTGAATTTCTCCCA<br>Reverse: CGTAGCCGAAGAAACCTCAT    |
| Human | <i>NQO1</i>     | Forward: TTTGGAGTCCCTGCCATTCT<br>Reverse: CCTTCTTACTCCGGAAGGGTC   |
| Human | <i>HO1</i>      | Forward: AGCAACAAAGTGCAAGATTC<br>Reverse: CCTGCATTCACATGGCATAA    |
| Human | <i>Catalase</i> | Forward: GAAGAAAGCGGTCAAGAACT<br>Reverse: GTGAATCGCATTCTTAGGCT    |
| Human | <i>SOD1</i>     | Forward: GCATCATCAATTCGAGCAG<br>Reverse: AAGTCTCCAACATGCCTCT      |

---

---

|       |                              |                                                                    |
|-------|------------------------------|--------------------------------------------------------------------|
| Human | <i>SOD2</i>                  | Forward: GTTGGCCAAGGGAGATGTTA<br>Reverse: AAGTCACGTTTGATGGCTTC     |
| Human | <i>NDUFA1</i>                | Forward: ACCCAGAAGTAGGGTTTTGG<br>Reverse: TTCTCAAACCCCTTGACAC      |
| Human | <i>NDUFS1</i>                | Forward: CAAGGATTCTAGTCCCTCCG<br>Reverse: CTTAACATATTGCTTCTCCCG    |
| Human | <i>SDHA</i>                  | Forward: AACATGGAGGAGGACAACCTG<br>Reverse: CATATCGCAGAGACCTCCA     |
| Human | <i>SDHB</i>                  | Forward: TTGTTCCCGATTTGAGCAAC<br>Reverse: TCACGCTTCTATGGACTG       |
| Human | <i>UQCRB</i>                 | Forward: TGGTCAAATGGCTGGTAAG<br>Reverse: CTCGCATTAACCCAGTTTA       |
| Human | <i>UQCRQ</i>                 | Forward: TCAGCTACAGCTTGTACC<br>Reverse: AAACACTACAACTGCGGC         |
| Human | <i>COX6C</i>                 | Forward: GCTTTGTATAAGTTTCGTGTGG<br>Reverse: AACTGAGAAAGACTTACTGTCC |
| Human | <i>COX7C</i>                 | Forward: GATCTGCATTTGCTACACCC<br>Reverse: GGCTGCACCTCTTAAAATGC     |
| Human | <i>ATP5A1</i>                | Forward: TTCCGCGGTATAATCAACAC<br>Reverse: GCAGTCCCAGTCTTTGAAG      |
| Human | <i>ATP5B1</i>                | Forward: CCTGTTGGTCCTGAGACTTT<br>Reverse: CCAAAAAGCCCAATTTGCC      |
| Mouse | <i>D-loop</i><br>(for DNA)   | Forward: AGGCATGAAAGGACAGCA<br>Reverse: TTGGCATTAAAGAGGAGGG        |
| Mouse | <i>18S rRNA</i><br>(for DNA) | Forward: GAGAAACGGCTACCACATCC<br>Reverse: CACCAGACTTGCCCTCCA       |

---

**Table S2** siRNAs

| Species | Gene                            | Primer (5'-3')                 |
|---------|---------------------------------|--------------------------------|
| Human   | <i>PGC-1<math>\alpha</math></i> | Forward: CCAGCCAACACUCAGCUAATT |
|         | <i>siRNA1</i>                   | Reverse: UUAGCUGAGUGUUGGCUGGTT |
| Human   | <i>PGC-1<math>\alpha</math></i> | Forward: CCACCACUCCUCCUCAUAATT |
|         | <i>siRNA2</i>                   | Reverse: UUAUGAGGAGGAGUGGUGGTT |
| Human   | <i>PGC-1<math>\alpha</math></i> | Forward: GCUAUGGUUUCAUUACCUATT |
|         | <i>siRNA3</i>                   | Reverse: UAGGUAAUGAAACCAUAGCTT |
| Human   | <i>Nrf2</i>                     | Forward: GGUUGAGACUACCAUGGUUTT |
|         | <i>siRNA1</i>                   | Reverse: AACCAUGGUAGUCUCAACCTT |
| Human   | <i>Nrf2</i>                     | Forward: GACAGAAGUUGACAAUUAUTT |
|         | <i>siRNA2</i>                   | Reverse: AUAAUUGUCAACUUCUGUCTT |
| Human   | <i>Nrf2</i>                     | Forward: CCAGAACACUCAGUGGAAUTT |
|         | <i>siRNA3</i>                   | Reverse: AUUCCACUGAGUGUUCUGGTT |
